# Supplementary material for: Associations between reproductive factors and frailty in middle-aged and older women: Evidence from the China Health and Retirement Longitudinal Study
Source: Research Square preprint supplement (doi:10.21203/rs.3.rs-6270693/v1), 2025-05-14
Supplement: Supplementary file 1 [file b233193785d444ae9ca748b4.docx]

**Supplementary Online Content**

**eTable1.Selection of items in questionaire of CHARLS to calculate frailty score**

**eTable 2.Questionnaire Items and Classification Criteria of Covariates.**

**eTable1.Selection of items in questionaire of CHARLS to calculate frailty score**

| **Items** | **Cut-off points** |
| --- | --- |
| **Ⅰ. Physical limitations (n=18)** |  |
| Difficulty with walking 100 Metres | 0=did not have any problems with the activity; 1=some difficulty with the activity or could not do the activity |
| Difficulty with walking 100 Metres |
| Difficulty with getting up from chair after sitting for long periods |
| Difficulty with climbing several flights of stairs without resting |
| Difficulty with stooping, kneeling, or crouching |
| Difficulty with reaching or extending arms above shoulder level |
| Difficulty with reaching or extending arms above shoulder level |
| Difficulty with picking up a small coin from a table. |
| Difficulty with dressing |
| Difficulty with bathing or showering |
| Difficulty with eating |
| Difficulty with getting out of bed and walking |
| Difficulty with using the toilet, including getting up or down |
| Difficulty with managing money |
| Difficulty with taking medications |
| Difficulty with shopping for groceries |
| Difficulty with preparing a hot meal |
| Difficulty with cleaning house. |
| **Ⅱ. CESD-10 (n=10)** |  |
| Felt depressed | 0=Rarely or none of the time;  1= Some or a little of the time/ Occasionally or a moderate amount of the time/ Most or all of the time |
| Felt sleep was restless |
| Felt everything they did was an effort |
| Felt lonely |
| Bothered by little things |
| Could not get going |
| Had trouble keeping mind on what is doing |
| Felt fearful |
| Be happy | 0= Most or all of the time;  1=Some or a little of the time/ Occasionally or a moderate amount of the time/ Rarely or none of the time |
| Felt hopeful about the future |
| **Ⅲ. Comorbidities (n=13)** |  |
| Hypertension | 0=never diagnosed;  1=ever diagnosed. |
| Diabetes |
| Lung disease |
| Heart problem |
| Stroke |
| Arthritis |
| Dyslipidemia |
| Liver disease |
| Kidney disease |
| Stomach/digestive disease |
| Asthma |
| Memory problem |
| **Ⅳ. History of trauma (n=2)** |  |
| Fractured hip | 0=never experienced;  1=ever experienced |
| Fallen down |
| **Ⅴ. Cognitive impairment (n=3)** |  |
| Cannot answer correct month given | 0=can correctly answer;  1=cannot correctly answer |
| Cannot answer correct year given. |
| Cannot answer correct year given. |
| **Ⅵ. Others (n=4)** |  |
| Hearing problem | 0=never had;  1=ever had |
| Eyesight problem |
| Self-reported pain | 0=never troubled with anybody pains;  1=a little/ somewhat/ quite a bit/ very often troubled with body pains |
| Self-reported health | 0=very good/ good;  1=fair/ poor/ very poor |

**eTable 2. Questionnaire Items and Classification Criteria of Covariates.**

| **Variables** | **Questionnaire Items** |
| --- | --- |
| Basic social characteristics | |
| Age | What’s your data of birth? (＜65 or ≥65) |
| Residence | Was your address in the village or city/town? (village or city/town ) |
| Education level | What’s the highest level of education your have now?(illiterate or primary school or below or above) |
| Marital status | What is your marital status?(Married or separated/divorced/widowed/never married) |
| Lifestyle and health behaviors | |
| Drink | Did you ever drink alcoholic beverages in the past?(yes or no) |
| Smoke | Have you ever smoked?(yes or no) |
| Social participation | Have you done any of these activities in the last month?(yes or no) |
| Physical activities | Do you usually take this type of physical activities for at least 10 minutes every week?(yes or no) |
| Health status | |
| Hypertension | Have you been diagnosed with Hypertension by a doctor?(yes or no) |
| Diabetes | Have you been diagnosed with Diabetes or high blood sugar by a doctor?(yes or no) |
| Heart disease | Have you been diagnosed with heart disease by a doctor?(yes or no) |
| BMI | Weight and height measurement(＜18.5 or 18.5-24 or 24-28 or ≥28) |
| Cognition and Depression | |
| Self satisfaction | Please think about your life-as-a-whole. How satisfied are you with it?(completely satisfied/very satisfied/somewhat satisfied or not very satisfied/not at all satisfied) |
| Health self-assessment | Would you say your health is very good, good, fair, poor or very poor?(very good/good or fair or poor/very poor) |
| Depressive symptom | I was bothered by things that don’t usually bother me.(<1 day or 1-2 days or 3-4 days or 5-7 days) |
| I had trouble keeping my mind on what I was doing.(<1 day or 1-2 days or 3-4 days or 5-7 days) |
| I felt depressed.(<1 day or 1-2 days or 3-4 days or 5-7 days) |
| I felt everything I did was an effort.(<1 day or 1-2 days or 3-4 days or 5-7 days) |
| I felt hopeful about the future.(<1 day or 1-2 days or 3-4 days or 5-7 days) |
| I felt fearful.(<1 day or 1-2 days or 3-4 days or 5-7 days) |
| My sleep was restless.(<1 day or 1-2 days or 3-4 days or 5-7 days) |
| I was happy.(<1 day or 1-2 days or 3-4 days or 5-7 days) |
| I felt lonely.(<1 day or 1-2 days or 3-4 days or 5-7 days) |
| I could not get “going”.(<1 day or 1-2 days or 3-4 days or 5-7 days) |

Note:BMI:Body mass index.
